# Supplementary material for: Amine-Regulated pri-SMTP Oxidation in SMTP Biosynthesis in Stachybotrys: Possible Implication in Nitrogen Acquisition
Source: MDPI journal article supplement (doi:10.3390/jof8090975), 2022-09-18
Supplement: s1 [file s1]

# Amine-Regulated pri-SMTP Oxidation in SMTP Biosynthesis in *Stachybotrys*: Possible Implication in Nitrogen Acquisition

Ryota Iwama <sup>1</sup>, Yu Sasano <sup>1</sup>, Taichi Hiramatsu <sup>1</sup>, Shinya Otake <sup>1</sup>, Eriko Suzuki <sup>1</sup>, and Keiji Hasumi <sup>1,2,\*</sup>

<sup>1</sup> Department of Applied Biological Science, Tokyo University of Agriculture and Technology, Fuchu, Japan

<sup>2</sup> Department of Research and Development, TMS Co., Fuchu, Japan

\* Correspondence: hasumi@cc.tuat.ac.jp

## Contents

Figure S1: <sup>1</sup>H- and <sup>13</sup>C-NMR spectra of pri-SMTP

Figure S2: Two-dimensional NMR spectroscopic analysis of pri-SMTP

Figure S3: Peptides mapped via the peptide mass fingerprint analysis of the 51 kDa protein

Figure S4: Localization of pri-SMTP oxidase-like gene in scaffold1638 of *S. chlorohalonata* IBT 40285 (GenBank KL660690.1), and putative functions of the genes therein

Figure S5: Identification of a cluster of genes possibly involved in the biosynthesis of ilicicolin B/SMTP-like metabolites in scaffold432 in the *S. chlorohalonata* IBT 40285 genome

Figure S6: Fluorescence microscopic visualization of pri-SMTP-accumulating cells

Table S1: Assignment of the <sup>1</sup>H- and <sup>13</sup>C-NMR spectral data for pri-SMTP

Table S2: Physicochemical properties of pri-SMTP

Table S3: Summary of the purification of pri-SMTP oxidase

Table S4: Details of the search setting and supporting peptide results

Table S5: Supporting peptides

Figure S1

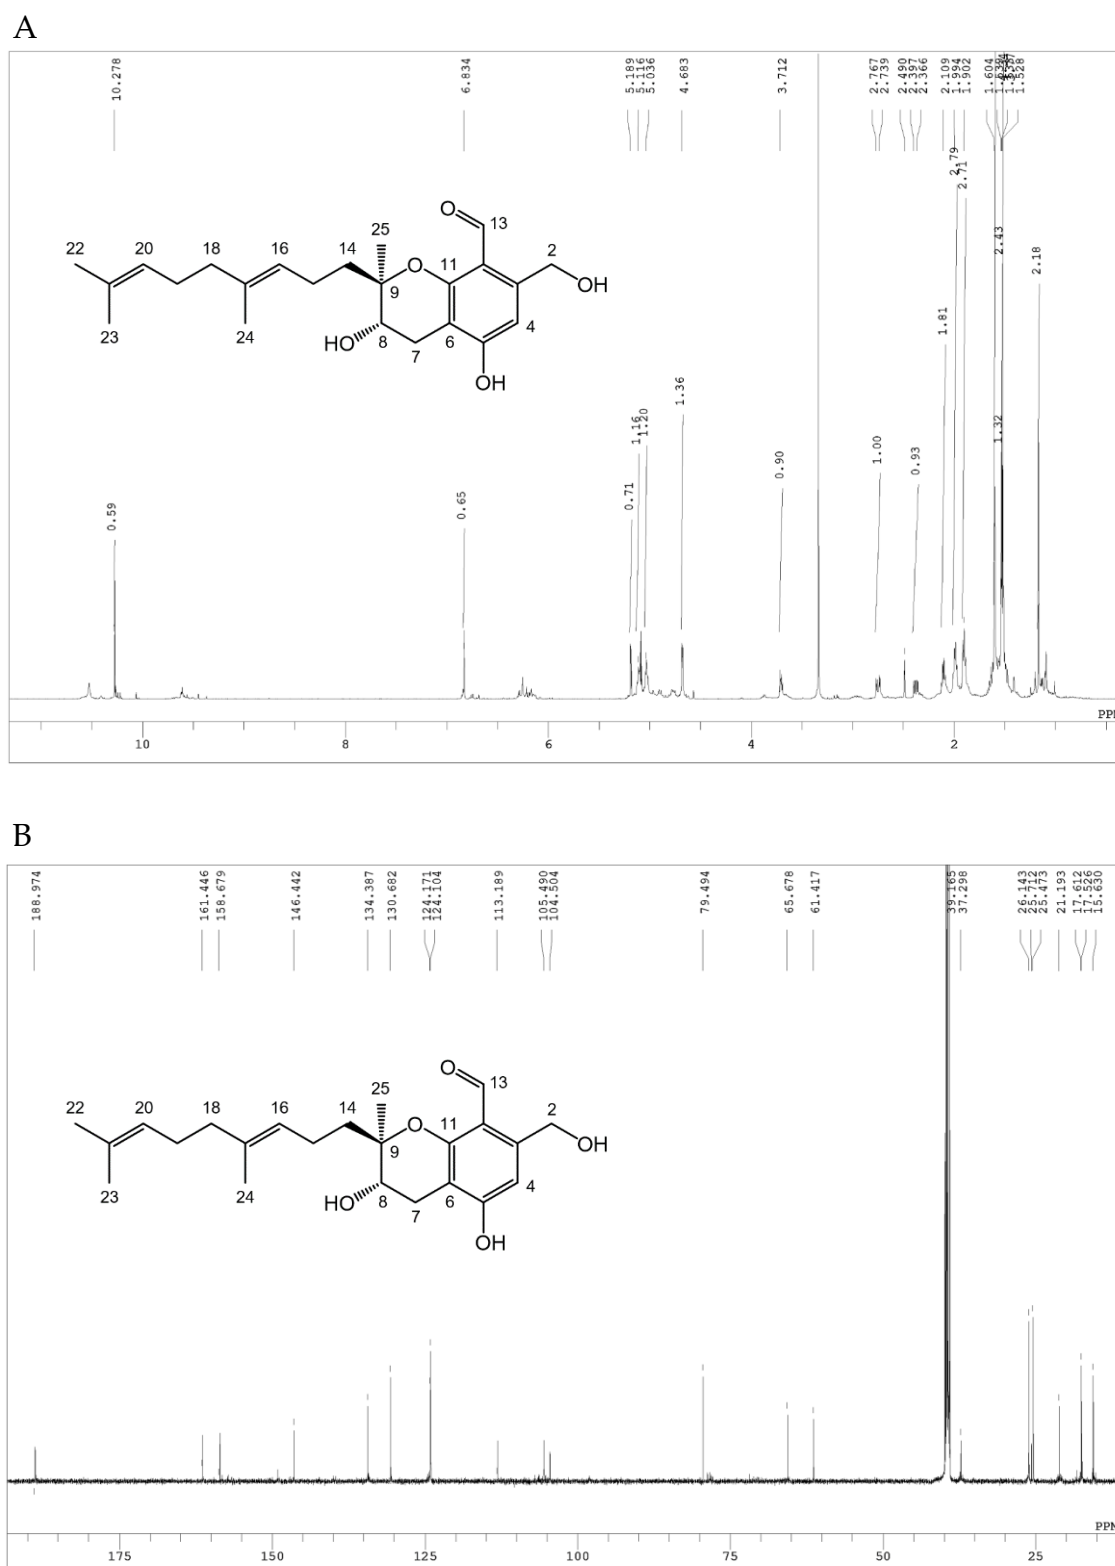

**Figure S1.**  $^1\text{H}$ - and  $^{13}\text{C}$ -NMR spectra of pri-SMTP. The  $^1\text{H}$ -NMR (A) and  $^{13}\text{C}$ -NMR (B) spectra were obtained using dimethyl sulfoxide- $d_6$  ( $\delta_{\text{H}}$  2.50 ppm;  $\delta_{\text{C}}$  39.52 ppm).

Figure S2

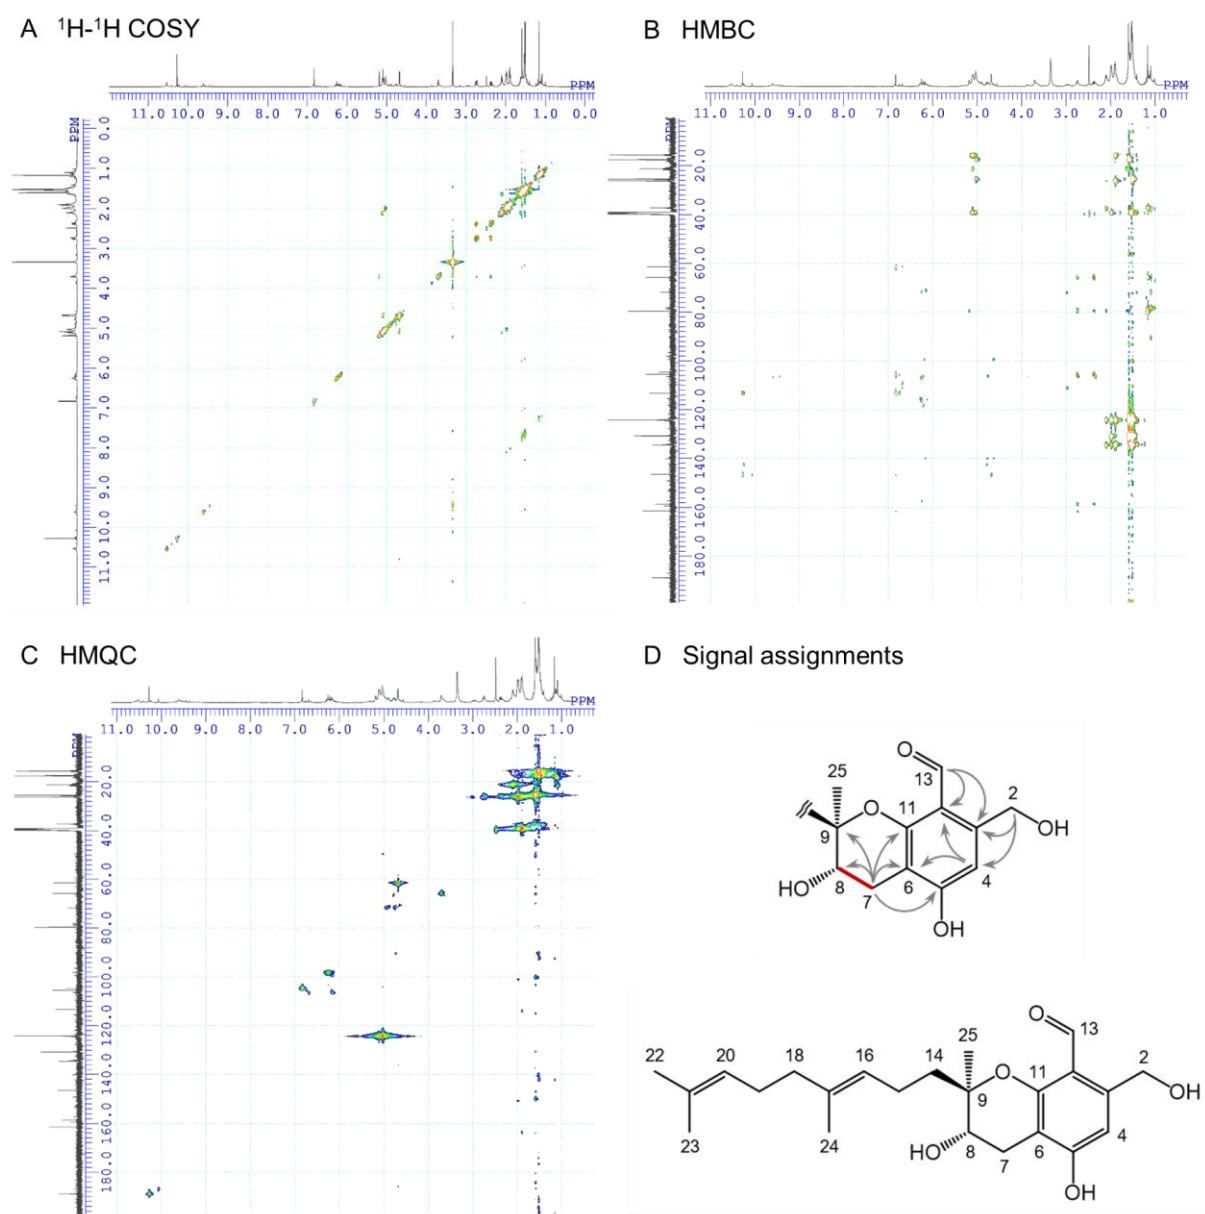

**Figure S2. Two-dimensional NMR spectroscopic analysis of pri-SMTP.** (A)  $^1\text{H}$ - $^1\text{H}$  correlation spectroscopy (COSY), (B)  $^1\text{H}$ -detected multi-bond heteronuclear multiple quantum coherence (HMBC), and (C)  $^1\text{H}$ -detected multiple quantum coherence (HMQC) spectra of pri-SMTP in dimethyl sulfoxide- $d_6$ . (D) Assignment of the structure based on the combination of the coupling data. *Arrows*, HMBC long-range couplings; *red bond*, COSY vicinal coupling.

Figure S3

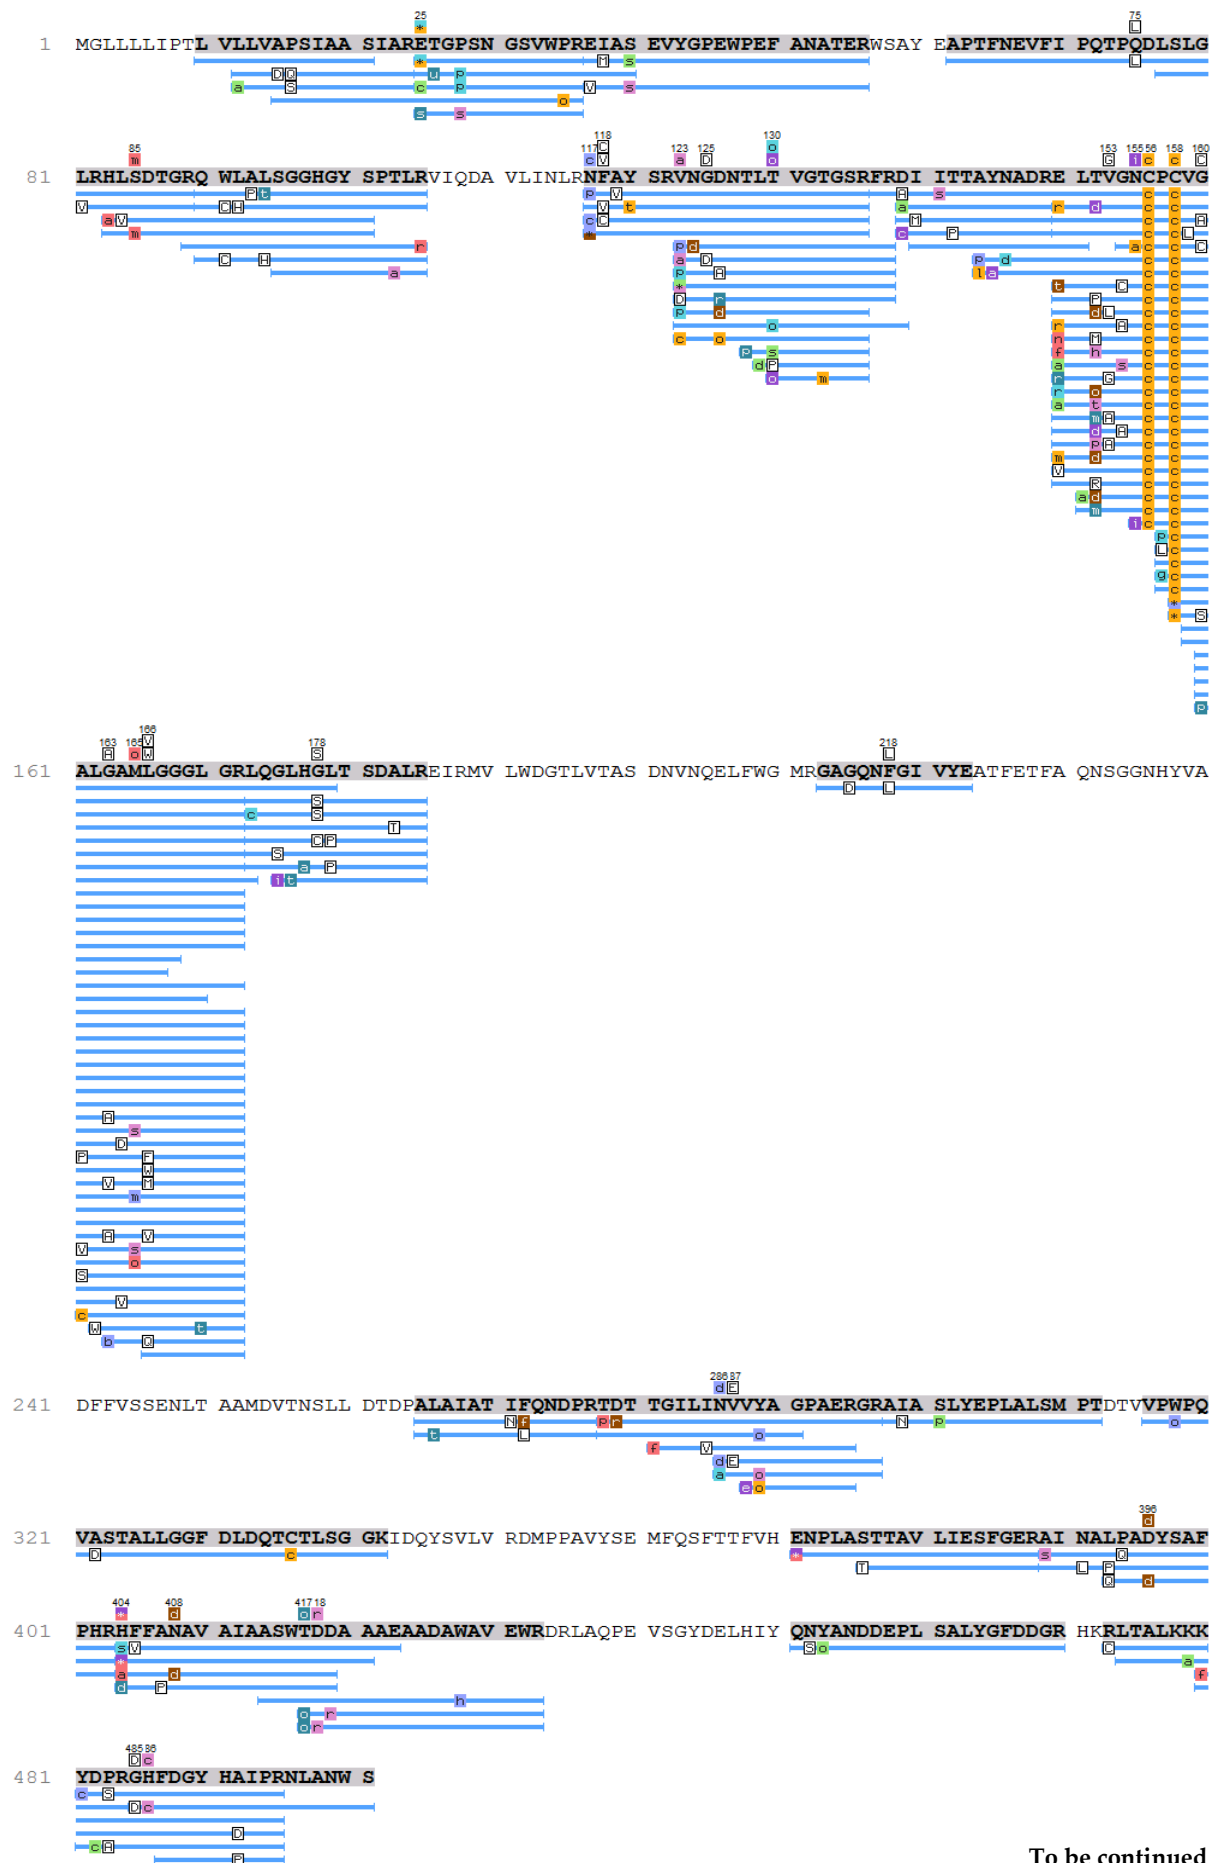

To be continued

**Figure S3 (continued)**

|                                                                       |                                                                                                                     |
|-----------------------------------------------------------------------|---------------------------------------------------------------------------------------------------------------------|
| <b>5</b> 5-dimethylaminonaphthalene-1-sulfonate (+233.05)             | <b>3</b> 3-sulfanylpropanoyl (+88.00)                                                                               |
| <b>d</b> Deoxy (-15.99)                                               | <b>4</b> 4-sulfophenyl isothiocyanate (+214.97)                                                                     |
| <b>d</b> Diethylation (+56.06)                                        | <b>3</b> 3-Sulfobenzoic succinimidyl ester (+183.98)                                                                |
| <b>d</b> 2,4-diacetamido-2,4,6-trideoxyglucopyranose (+228.11)        | <b>t</b> Tyrosine oxidation to 2-aminotyrosine (+15.01)                                                             |
| <b>d</b> Deamidation followed by esterification with ethanol (+29.04) | <b>t</b> Thiophosphorylation (+95.94)                                                                               |
| <b>d</b> Dehydration (-18.01)                                         | <b>t</b> Trifluoroisoleucine (+53.97)                                                                               |
| <b>d</b> Dimethylation (+28.03)                                       | <b>t</b> Tri nitro benzene (+210.99)                                                                                |
| <b>e</b> Ethylation (+28.03)                                          | <b>U</b> Ubiquitin (+114.04)                                                                                        |
| <b>f</b> Fluorination (+17.99)                                        | <b>*</b> Amidination of lysines or N-terminal amines with methyl acetimidate (+41.03), 3-sulfanylpropanoyl (+88.00) |
| <b>f</b> Formylation (+27.99)                                         | <b>*</b> Carboxymethyl (+58.01), Hexose (+162.05)                                                                   |
| <b>g</b> Glycosyl-L-hydroxyproline (+148.04)                          | <b>*</b> Carboxymethyl (+58.01), N-Succinimidyl-2-morpholine acetate (+127.06)                                      |
| <b>h</b> Hexose (+162.05)                                             | <b>*</b> Ethylation (+28.03), Aminoethylbenzenesulfonylation (+183.04)                                              |
| <b>h</b> HexNAcylation (ST) (+203.08)                                 | <b>*</b> ISD (z+2)-series (-15.01), Sodium adduct (+21.98)                                                          |
| <b>i</b> ISD (z+2)-series (-15.01)                                    | <b>*</b> 3-methyl-2-pyridyl isocyanate (+134.05), Methylation (+14.02)                                              |
| <b>l</b> Levuglandinyl-lysine anhydropyrrole adduct (+298.19)         | <b>*</b> Piperidination (+68.06), Dimethylation (+28.03)                                                            |
| <b>m</b> Methylation (+14.02)                                         | <b>D</b> A->D                                                                                                       |
| <b>m</b> Methylphosphorylation (+77.99)                               | <b>P</b> A->P                                                                                                       |
| <b>m</b> Malonylation (+86.00)                                        | <b>S</b> A->S                                                                                                       |
| <b>m</b> Methionine replacement by azido homoalanine (-4.99)          | <b>T</b> A->T                                                                                                       |
| <b>n</b> Naphthalene-2,3-dicarboxaldehyde (+175.04)                   | <b>V</b> A->V                                                                                                       |
| <b>o</b> Oxidation or Hydroxylation (+15.99)                          | <b>D</b> D->A                                                                                                       |
| <b>o</b> Oxidation to nitro (+44.99)                                  | <b>V</b> E->V                                                                                                       |
| <b>o</b> O-Diisopropylphosphorylation (+164.06)                       | <b>C</b> F->C                                                                                                       |
| <b>o</b> O-Isopropylphosphorylation (+122.01)                         | <b>L</b> F->L                                                                                                       |
| <b>o</b> Octanoyl (+126.10)                                           | <b>V</b> F->V                                                                                                       |
| <b>o</b> O-Diethylphosphorylation (+136.03)                           | <b>A</b> G->A                                                                                                       |
| <b>o</b> O-Ethylphosphorylation (+108.00)                             | <b>C</b> G->C                                                                                                       |
| <b>o</b> O-Pinacolylmethylphosphorylation (+162.08)                   | <b>D</b> G->D                                                                                                       |
| <b>o</b> Oxidation (M) (+15.99)                                       | <b>S</b> G->S                                                                                                       |
| <b>P</b> Phosphorylation (STY) (+79.97)                               | <b>V</b> G->V                                                                                                       |
| <b>P</b> Propionamide (K, X@N-term) (+71.04)                          | <b>M</b> I->M                                                                                                       |
| <b>P</b> Pyridylacetyl (+119.04)                                      | <b>N</b> I->N                                                                                                       |
| <b>P</b> Pyrrolidone from Proline (-27.99)                            | <b>V</b> I->V                                                                                                       |
| <b>P</b> Piperidination (+68.06)                                      | <b>F</b> L->F                                                                                                       |
| <b>P</b> Pyrophosphorylation (ST) (+159.93)                           | <b>H</b> L->H                                                                                                       |
| <b>P</b> Phospho-propargylamine (+117.00)                             | <b>M</b> L->M                                                                                                       |
| <b>r</b> Replacement of proton by potassium (+37.96)                  | <b>P</b> L->P                                                                                                       |
| <b>r</b> Replacement of proton by lithium (+6.01)                     | <b>Q</b> L->Q                                                                                                       |
| <b>r</b> Replacement of 2 protons by nickel (+55.92)                  | <b>V</b> L->V                                                                                                       |
| <b>r</b> Replacement of proton by silver (+105.90)                    | <b>W</b> L->W                                                                                                       |
| <b>r</b> Replacement of 2 protons by magnesium (+21.97)               | <b>L</b> N->L                                                                                                       |
| <b>r</b> Replacement of proton with ammonium ion (+17.03)             | <b>S</b> N->S                                                                                                       |
| <b>S</b> Sulfation (+79.96)                                           |                                                                                                                     |

**Figure S3. Peptides mapped via the peptide mass fingerprint analysis of the 51 kDa protein.** The peptide mass fingerprint analysis was performed using PEAKS DB (Bioinformatics Solutions Inc., Waterloo, ON, Canada). Annotation symbols are given in the lower panel. Details of the search setting and supporting peptide results are shown in Table S4 and Table S5, respectively.

**Figure S4**

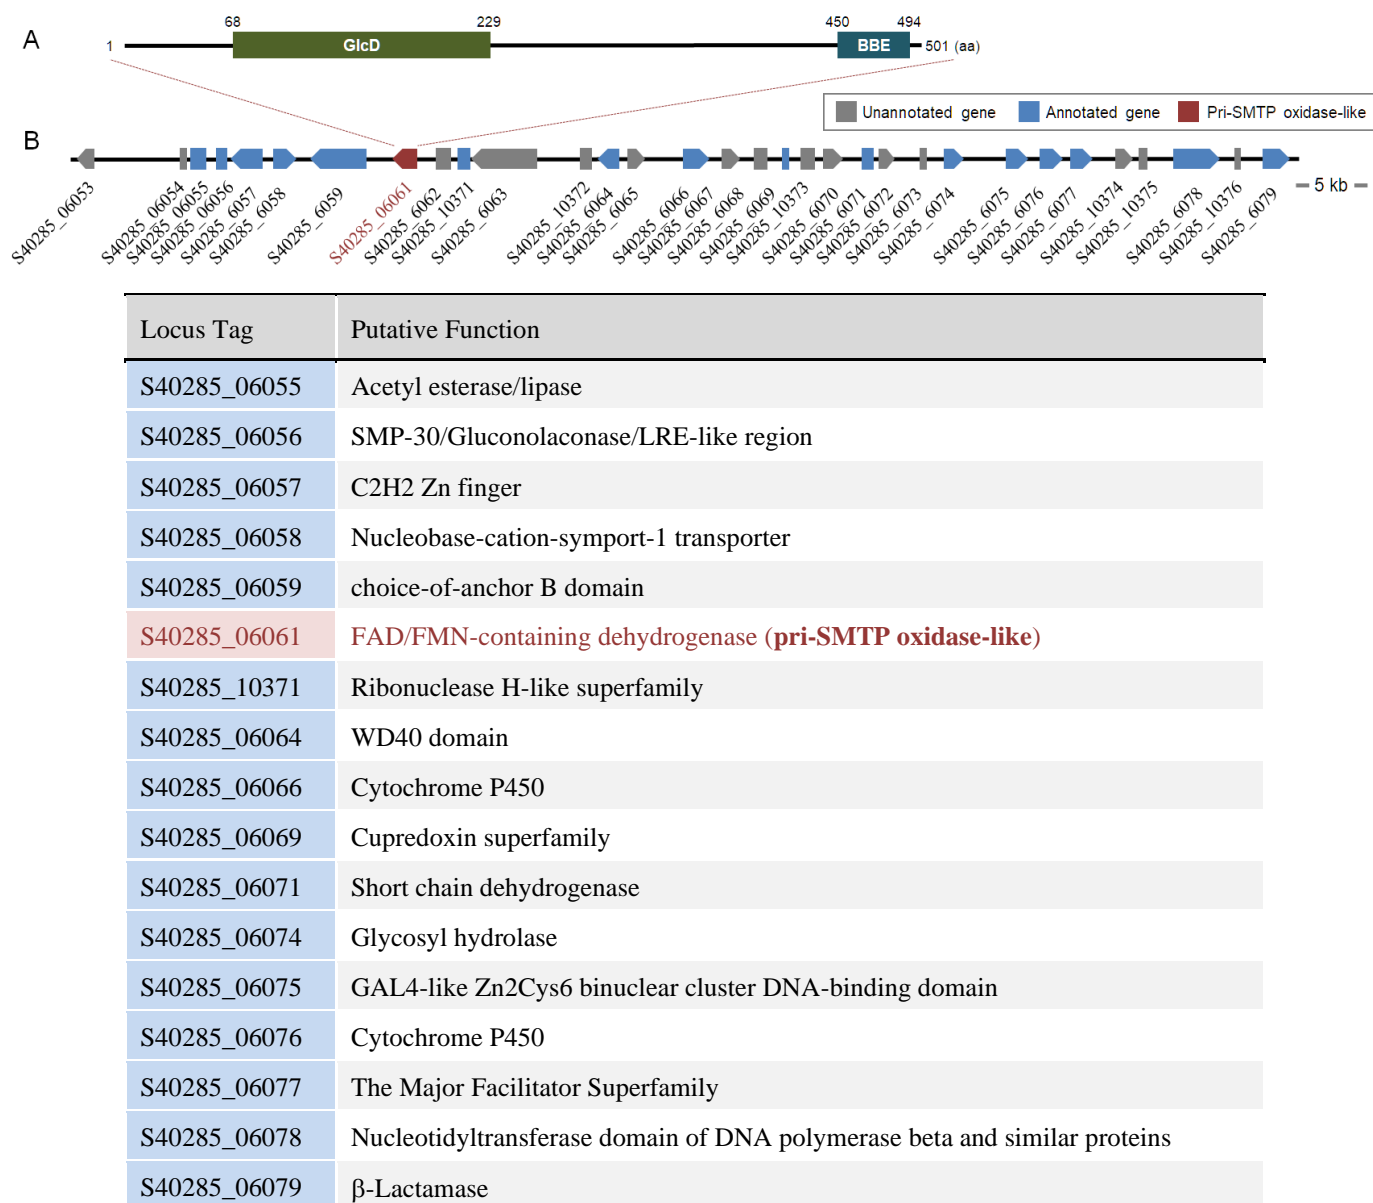

**Figure S4. Localization of pri-SMTP oxidase-like gene in scaffold1638 of *S. chlorohalonata* IBT 40285 (GenBank KL660690.1), and putative functions of the genes therein.** (A) Functional domains predicted for pri-SMTP oxidase. The prediction was based on the sequence of an orthologue of pri-SMTP oxidase gene identified in scaffold1638 (GenBank KL660690.1) of *S. chlorohalonata* IBT 40285 genomic DNA sequences [21]. GlcD, glycolate oxidase subunit D superfamily domain; BBE, berberine and berberine-like superfamily domain found in berberine bridge and berberine bridge-like enzymes in a class of FAD-linked oxidases. (B and the lower table) Scaffold1638 contains >30 possible genes that seems to be unrelated to secondary metabolism. The annotation was based on the functional domain searches [19] using the predicted amino acid sequences of the genes in scaffold1638 (GenBank KL660690.1). A search for secondary metabolite biosynthesis genes using antiSMASH fungal version (ver. 6.0.1) [20] failed to find any candidates in this scaffold.

**Figure S5**

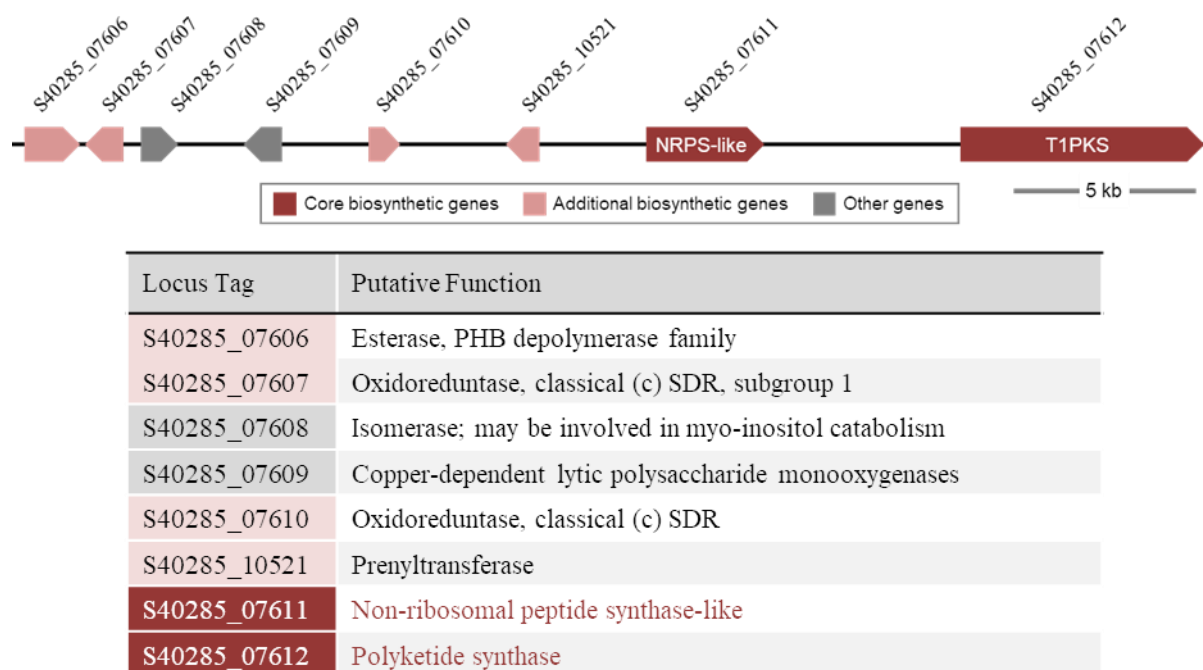

**Figure S5. Identification of a cluster of genes possibly involved in the biosynthesis of ilicicolin B/SMTP-like metabolites in scaffold432 in the *S. chlorohalonata* IBT 40285 genome.** A putative SMTP biosynthesis gene cluster is found in a different scaffold than the scaffold that contains pri-SMTP oxidase-like gene (Figure S4). The search for a cluster of secondary metabolite biosynthesis genes was performed using antiSMASH fungal version (ver. 6.0.1) [20]. The annotation was based on the functional domain searches [19] using the predicted amino acid sequences of the genes in scaffold432 (GenBank KL659535.1). NRPS, non-ribosomal peptide synthase; T1PKS, type I polyketide synthase.

**Figure S6**

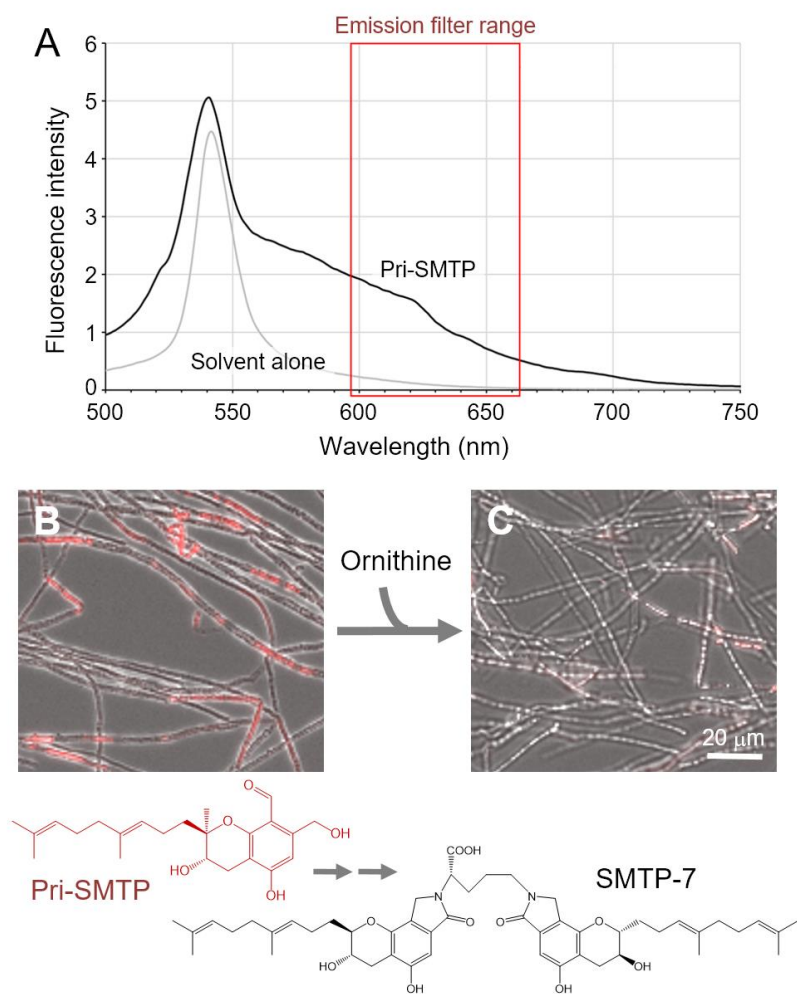

**Figure S6. Fluorescence microscopic visualization of pri-SMTP-accumulating cells.** (A) Fluorescence spectrum of pri-SMTP in in MeCN–0.1% (vol vol<sup>-1</sup>) formic acid aq. (7:1) with an excitation at 540 nm. The range of the emission wavelength acquirable using a BZ-X TxasRed filter, with median excitation and emission wavelengths at 560 and 630 nm, respectively, is shown. (B) Fluorescence microscopic analysis of the localization of pri-SMTP in *S. microspora*. Particular septate cells are positive in fluorescence when using a BZ-X TexasRed filter. (C) Fluorescence largely disappears after L-ornithine feeding, in consistent with the decrease in the pri-SMTP levels as determined via UPLC analysis (see Figure 2). The structures of pri-SMTP and SMTP-7 are shown.



**Table S1. Assignment of the  $^1\text{H}$ - and  $^{13}\text{C}$ -NMR spectral data for pri-SMTP.**

| No. | $\delta_{\text{C}}$ | $\delta_{\text{H}}$ |                             |
|-----|---------------------|---------------------|-----------------------------|
| 1   |                     | 5.19                | (OH, 1 H, d, $J = 4.8$ )    |
| 2   | 61.4                | 4.68                | (2 H, d, $J = 4.8$ )        |
| 3   | 146.4               |                     |                             |
| 4   | 104.1               | 6.83                | (1 H, s)                    |
| 5   | 161.4               |                     |                             |
| 6   | 105.5               |                     |                             |
| 7   | 26.1                | 2.75                | (1 H, dd, $J = 6.0, 16.2$ ) |
|     |                     | 2.38                | (1 H, dd, $J = 8.4, 17.4$ ) |
| 8   | 65.7                | 3.71                | (1 H, m)                    |
| 9   | 79.5                |                     |                             |
| 11  | 158.7               |                     |                             |
| 12  | 113.2               |                     |                             |
| 13  | 189.0               | 10.28               | (1 H, s)                    |
| 14  | 37.3                | 1.54                | (2 H, m)                    |
| 15  | 21.2                | 2.11                | (2 H, m)                    |
| 16  | 124.2               | 5.09                | (1 H, m)                    |
| 17  | 134.4               |                     |                             |
| 18  | 39.2                | 1.90                | (2 H, m)                    |
| 19  | 25.7                | 1.99                | (2 H, m)                    |
| 20  | 124.1               | 5.01                | (1 H, m)                    |
| 21  | 130.7               |                     |                             |
| 22  | 25.5                | 1.60                | (3 H, s)                    |
| 23  | 17.5                | 1.52                | (3 H, s)                    |
| 24  | 15.6                | 1.53                | (3 H, s)                    |
| 25  | 17.6                | 1.12                | (3 H, s)                    |

**Table S2. Physicochemical properties of pri-SMTP.**

|                                            |                                                                                                |
|--------------------------------------------|------------------------------------------------------------------------------------------------|
| Appearance                                 | Brown oil or white powder                                                                      |
| Molecular formula                          | C <sub>23</sub> H <sub>32</sub> O <sub>5</sub>                                                 |
| ESI-MS (m/z)                               |                                                                                                |
| Found                                      | 387.2177 (M – H) <sup>-</sup>                                                                  |
| Calcd                                      | 387.2177 for C <sub>23</sub> H <sub>31</sub> O <sub>5</sub>                                    |
| UV λ <sub>max</sub> nm (ε)                 |                                                                                                |
| MeOH–0.1% formic acid, aq. 21:4 (v/v)      | 208 (43,900), 228 (9,880, sh), 271 (1,760), 280 (1,780)                                        |
| MeCN–0.1% formic acid, aq. 7:1 (v/v)       | 230 (11,600, sh), 285 (7,440), 320 (3,900, sh)                                                 |
| IR ν <sub>max</sub> (KBr) cm <sup>-1</sup> | 3348, 2967, 2919, 1631, 1606, 1593, 1503, 1457, 1401, 1377, 1343, 1296, 1238, 1160, 1100, 1007 |

**Table S3. Summary of the purification of pri-SMTP oxidase.**

| Step             | Total protein (mg) | Total activity (nmol min <sup>-1</sup> ) | Specific activity (nmol mg <sup>-1</sup> min <sup>-1</sup> ) | Yield (%) |
|------------------|--------------------|------------------------------------------|--------------------------------------------------------------|-----------|
| Cytosol          | 340                | 6,107                                    | 18.0                                                         | 100       |
| Ammonium sulfate | 64.9               | 4,637                                    | 71.4                                                         | 75.9      |
| 1st Hiprep Q     | 10.9               | 737                                      | 67.6                                                         | 12.1      |
| 2nd Hiprep Q     | 2.75               | 686                                      | 249                                                          | 11.2      |

Pri-SMTP oxidase activity was obtained by measuring the consumption of pri-SMTP.

**Table S4. Parameters for the peptide mass fragment analysis.**

| Instrument parameters                       |                                       |
|---------------------------------------------|---------------------------------------|
| Fractions: sample2.raw                      |                                       |
| Ion Source: ESI(nano-spray)                 |                                       |
| Fragmentation Mode: CID, CAD (y and b ions) |                                       |
| MS Scan Mode: FT-ICR/Orbitrap               |                                       |
| MS/MS Scan Mode: Linear Ion Trap            |                                       |
| Search parameters                           |                                       |
| Search Engine Name: PEAKS                   | Max Variable PTM Per Peptide: 3       |
| Parent Mass Error Tolerance: 10.0 ppm       | Database: NCBI_S_chlorohalonata       |
| Fragment Mass Error Tolerance: 0.5 Da       | Taxon: All                            |
| Precursor Mass Search Type: monoisotopic    | Searched Entry: 10720                 |
| Enzyme: Trypsin                             | FDR Estimation: Enabled               |
| Max Missed Cleavages: 3                     | De novo score (ALC%) threshold: 15    |
| Digest Mode: Semispecific                   | Peptide hit threshold (-10logP): 30.0 |
| Fixed Modifications:                        | Peaks run ID: 14                      |
| Carboxymethyl: 58.01                        | Merge Options: no merge               |
| Variable Modifications:                     | Precursor Options: corrected          |
| Oxidation (M): 15.99                        | Charge Options: no correction         |
| Deamidation (NQ): 0.98                      | Filter Quality: >0.65                 |
| Acetylation (K): 42.01                      | Filter Charge: 1-6                    |
| Acetylation (Protein N-term): 42.01         | Process: true                         |
| Acetylation (N-term): 42.01                 | Associate chimera: yes                |
| Amidation: -0.98                            |                                       |
| Beta-methylthiolation: 45.99                |                                       |
| Biotinylation: 226.08 and 476 more          |                                       |

Table S5. Supporting peptides.

| Entry | Supporting peptide                                              | Uniq | -10<br>lgP | Mass      | Length | ppm  | m/z       | z | RT    | Scan | Area     | Start | End | PTM                                                                                          |
|-------|-----------------------------------------------------------------|------|------------|-----------|--------|------|-----------|---|-------|------|----------|-------|-----|----------------------------------------------------------------------------------------------|
| 1     | C.VGALGAMLGGGLGR.L                                              | Y    | 78.09      | 1227.6758 | 14     | 0.3  | 614.8453  | 2 | 20.67 | 3811 | 2.75E+06 | 159   | 172 |                                                                                              |
| 2     | V.GALGAMLGGGLGR.L                                               | Y    | 74.94      | 1128.6073 | 13     | -0.5 | 565.3107  | 2 | 19.52 | 3405 | 2.95E+06 | 160   | 172 |                                                                                              |
| 3     | R.ELT(-18.01)VA(sub<br>G)NC(+58.01)PC(+58.01)VGALGAMLGGGLGR.L   | Y    | 73.83      | 2256.0701 | 23     | 6.8  | 1129.0499 | 2 | 24.73 | 5188 | 4.61E+06 | 150   | 172 | Dehydration; Carboxymethyl                                                                   |
| 4     | E.L(+41.03)T(-<br>15.99)VGNC(+58.01)PC(+58.01)VGALGAMLGGGLGR.L  | Y    | 72.38      | 2156.054  | 22     | 9.9  | 1079.0449 | 2 | 25.44 | 5375 | 4.06E+06 | 151   | 172 | Amidination of lysines or N-terminal amines with<br>methyl acetimidate; Deoxy; Carboxymethyl |
| 5     | R.V(+27.99)(sub<br>E)LTVGNC(+58.01)PC(+58.01)VGALGAMLGGGLGR.L   | Y    | 71.33      | 2258.0857 | 23     | 6.5  | 1130.0575 | 2 | 25.29 | 5480 | 3.38E+06 | 150   | 172 | Formylation; Carboxymethyl                                                                   |
| 6     | R.ELT(-15.99)L(sub<br>V)GNC(+58.01)PC(+58.01)VGALGAMLGGGLGR.L   | Y    | 68.68      | 2258.0857 | 23     | 6.5  | 1130.0575 | 2 | 25.29 | 5422 | 1.20E+07 | 150   | 172 | Deoxy; Carboxymethyl                                                                         |
| 7     | R.E(+175.04)LM(sub<br>T)VGNC(+58.01)PC(+58.01)VGALGAMLGGGLGR.L  | Y    | 59.23      | 2465.1001 | 23     | 0.4  | 822.7076  | 3 | 25.1  | 5540 | 1.36E+06 | 150   | 172 | Naphthalene-2,3-dicarboxaldehyde; Carboxymethyl                                              |
| 8     | H.FDGYHP(sub A)IPR.N                                            | Y    | 53.56      | 1100.5403 | 9      | -0.8 | 551.277   | 2 | 15.14 | 1818 | 1.97E+05 | 487   | 495 |                                                                                              |
| 9     | R.E(+14.02)LT(-<br>15.99)VGNC(+58.01)PC(+58.01)VGALGAMLGGGLGR.L | Y    | 52.92      | 2258.0857 | 23     | 6    | 753.707   | 3 | 25.29 | 5319 | 8.64E+06 | 150   | 172 | Methylation; Deoxy; Carboxymethyl                                                            |
| 10    | R.ELTVGNC(+58.01)PC(+58.01)L(sub<br>V)GALGAMLGGGLGR.L           | Y    | 51.85      | 2274.0806 | 23     | 6.7  | 1138.0552 | 2 | 21.33 | 3963 | 9.50E+05 | 150   | 172 | Carboxymethyl                                                                                |
| 11    | R.ELT(+79.97)A(sub<br>V)GNC(+58.01)PC(+58.01)VGALGAMLGGGLGR.L   | Y    | 48.06      | 2312      | 23     | 7.3  | 771.6796  | 3 | 25.29 | 5322 | 3.36E+06 | 150   | 172 | Phosphorylation (STY); Carboxymethyl                                                         |
| 12    | R.L(+57.02)QGLHS(sub G)LTSDALR.E                                | Y    | 46.75      | 1466.7841 | 13     | 0.1  | 734.3994  | 2 | 17.51 | 2636 | 6.06E+06 | 173   | 185 | Carbamidomethylation (DHKE, X@N-term)                                                        |
| 13    | R.ELR(sub<br>T)VGNC(+58.01)PC(+58.01)VGALGAMLGGGLGR.L           | Y    | 46.01      | 2315.1184 | 23     | -0.2 | 772.7133  | 3 | 25.32 | 5322 | 3.17E+05 | 150   | 172 | Carboxymethyl                                                                                |
| 14    | W.T(+162.08)DD(+17.03)AAAEAADAWAVEWR.D                          | Y    | 44.95      | 2025.9197 | 17     | 1.9  | 1013.969  | 2 | 28.16 | 6255 | 7.26E+05 | 417   | 433 | O-Pinacolylmethylphosphonylation; Replacement of<br>proton with ammonium ion                 |
| 15    | R.LQGLHGLTSDT(sub A)LR.E                                        | Y    | 43.19      | 1409.7627 | 13     | 0.9  | 705.8893  | 2 | 20.68 | 3790 | 4.15E+08 | 173   | 185 |                                                                                              |
| 16    | R.LQGLHC(sub G)P(sub L)TSDALR.E                                 | Y    | 41.48      | 1409.7085 | 13     | -2.7 | 705.8596  | 2 | 21.13 | 3916 | 2.08E+04 | 173   | 185 |                                                                                              |
| 17    | V.GALGAM(+15.99)LGGGLGR.L                                       | Y    | 40.77      | 1144.6023 | 13     | -0.1 | 573.3083  | 2 | 16.57 | 2288 | 9.93E+05 | 160   | 172 | Oxidation (M)                                                                                |
| 18    | W.T(+162.08)D(+17.03)DAAAEAADAWAVEWR.D                          | Y    | 40         | 2025.9197 | 17     | 1.9  | 1013.969  | 2 | 28.16 | 6213 | 7.26E+05 | 417   | 433 | O-Pinacolylmethylphosphonylation; Replacement of<br>proton with ammonium ion                 |
| 19    | K.KYDPRGHFDGYHD(sub A)IPR.N                                     | Y    | 38.98      | 1971.934  | 16     | 2.5  | 986.9767  | 2 | 25.89 | 5548 | 3.01E+06 | 480   | 495 |                                                                                              |
| 20    | R.ELTVGNC(+58.01)PC(+58.01)VA(sub<br>G)ALGAMLGGGLGR.L           | Y    | 38.21      | 2274.0806 | 23     | 6.4  | 759.039   | 3 | 21.33 | 4068 | 2.48E+06 | 150   | 172 | Carboxymethyl                                                                                |
| 21    | R.LQGLHS(sub G)LTSDALR.E                                        | Y    | 36.46      | 1409.7627 | 13     | 1.4  | 705.8896  | 2 | 21.03 | 3916 | 2.86E+08 | 173   | 185 |                                                                                              |
| 22    | R.E(+21.97)LT(-<br>18.01)VGNC(+58.01)PC(+58.01)VGALGAMLGGGLGR.L | Y    | 36.14      | 2264.0239 | 23     | -1.5 | 567.0124  | 4 | 20.82 | 3807 | 9.00E+04 | 150   | 172 | Replacement of 2 protons by magnesium; Dehydration;<br>Carboxymethyl                         |
| 23    | R.LQS(sub G)LHGLTSDALR.E                                        | Y    | 33.94      | 1409.7627 | 13     | -0.4 | 470.928   | 3 | 39.28 | 8454 | 0        | 173   | 185 |                                                                                              |
| 24    | M.LGGGLGR.L                                                     | N    | 33.72      | 628.3656  | 7      | 0.2  | 315.1901  | 2 | 12.64 | 1058 | 7.47E+05 | 166   | 172 |                                                                                              |
| 25    | R.QC(sub W)H(sub L)ALSGGHGYSPTLR.V                              | Y    | 32.8       | 1682.7947 | 16     | 4    | 842.408   | 2 | 38.7  | 8370 | 0        | 90    | 105 |                                                                                              |
| 26    | E.APTFNEVFIPQTPL(sub Q)DLSLGLRHLSDTGR.Q                         | Y    | 32.69      | 3093.6248 | 28     | -1.1 | 1032.2144 | 3 | 27.48 | 6128 | 3.86E+05 | 62    | 89  |                                                                                              |
| 27    | L.G(+226.08)AMQ(sub L)GGGLGR.L                                  | Y    | 32.27      | 1128.5168 | 10     | 5.6  | 565.2689  | 2 | 20.13 | 3581 | 1.02E+06 | 163   | 172 | Biotinylation                                                                                |
| 28    | G.A(+58.01)LGAMLGGGLGR.L                                        | Y    | 30.42      | 1129.5913 | 12     | -3.2 | 565.8011  | 2 | 20.16 | 3581 | 7.11E+04 | 161   | 172 | Carboxymethyl (KW, X@N-term)                                                                 |
| 29    | V.APSIAASIARETGPSNGSVWP(+15.99)R.E                              | Y    | 27.91      | 2239.1345 | 22     | -0.6 | 747.385   | 3 | 30.25 | 6806 | 9.78E+05 | 15    | 36  | Oxidation or Hydroxylation                                                                   |
| 30    | R.N(+68.06)FV(sub A)YSRVNGDNTLTVTGTGR.F                         | Y    | 25.92      | 2224.1235 | 20     | -3.4 | 742.3793  | 3 | 20.13 | 3646 | 1.29E+07 | 117   | 136 | Piperidination                                                                               |

(to be continued)

(continued)

|    |                                                              |   |       |           |    |      |           |   |       |      |          |     |     |                                                                                                         |
|----|--------------------------------------------------------------|---|-------|-----------|----|------|-----------|---|-------|------|----------|-----|-----|---------------------------------------------------------------------------------------------------------|
| 31 | R.ELP(sub T)VGNC(+58.01)PC(+58.01)VGALGAMLGGLGR.L            | Y | 25.53 | 2256.0701 | 23 | 6.8  | 1129.0499 | 2 | 24.73 | 5137 | 6.96E+05 | 150 | 172 | Carboxymethyl                                                                                           |
| 32 | R.ELT(+77.99)A(sub V)GNC(+58.01)PC(+58.01)VGALGAMLGGLGR.L    | Y | 25.33 | 2310.0208 | 23 | -8.6 | 578.5075  | 4 | 24.73 | 5178 | 3.28E+05 | 150 | 172 | Methylphosphonylation; Carboxymethyl                                                                    |
| 33 | C.VGALA(sub G)AMV(sub L)GGGLGR.L                             | Y | 25.14 | 1227.6758 | 14 | 0.3  | 614.8453  | 2 | 20.67 | 3866 | 2.75E+06 | 159 | 172 |                                                                                                         |
| 34 | V.GN(-17.03)C(+58.01)PC(+58.01)VC(sub G)ALGAMLGGLGR.L        | Y | 24.14 | 1846.7834 | 19 | -2.9 | 616.6     | 3 | 26.36 | 5828 | 7.85E+05 | 154 | 172 | Ammonia-loss (N); Carboxymethyl                                                                         |
| 35 | R.T(+117.00)D(+6.01)TTGILINVYAGPAERGR.A                      | Y | 24.08 | 2225.1182 | 20 | -1.3 | 742.7124  | 3 | 21.56 | 4251 | 8.04E+05 | 278 | 297 | Phosphopropargylamine; Replacement of proton by lithium                                                 |
| 36 | R.D(+43.99)IIP(sub T)TAYNADRE                                | Y | 23.37 | 1291.6044 | 11 | -8.1 | 646.8042  | 2 | 23.6  | 4947 | 3.33E+05 | 139 | 149 | Carboxylation (DKW)                                                                                     |
| 37 | R.LQGLH(+28.03)GP(sub L)TSDALRE                              | Y | 23.29 | 1391.7521 | 13 | 0.8  | 464.925   | 3 | 17.55 | 2645 | 0        | 173 | 185 | Acetaldehyde +28                                                                                        |
| 38 | R.LTALKK(+41.03)KYDPR.G                                      | Y | 23    | 1372.819  | 11 | -2.5 | 458.6125  | 3 | 22    | 4257 | 1.18E+04 | 474 | 484 | Amidination of lysines or N-terminal amines with methyl acetimidate                                     |
| 39 | T.T(+27.99)GILV(sub I)NVVYAGPAER.G                           | Y | 22.99 | 1585.8463 | 15 | 1    | 529.6232  | 3 | 25.01 | 5259 | 9.21E+04 | 281 | 295 | Formylation                                                                                             |
| 40 | C.P(-27.99)C(+58.01)VGALGAM(+88.00)LGGGLGR.L                 | Y | 22.85 | 1545.7466 | 16 | 7.2  | 516.2598  | 3 | 27.99 | 6188 | 0        | 157 | 172 | Pyrrolidone from Proline; Carboxymethyl; 3-sulfanylpropanoyl                                            |
| 41 | V.VPW(+44.99)PQVD(sub A)STALLGGFDLDQTC(+58.01)TLSGGKI        | Y | 22.6  | 2907.3596 | 27 | -2.8 | 970.1244  | 3 | 23.08 | 4610 | 4.71E+05 | 316 | 342 | Oxidation to nitro; Carboxymethyl                                                                       |
| 42 | R.E(+210.99)LTVC(sub G)NC(+58.01)PC(+58.01)VGALGAMLGGLGR.L_Q | Y | 22.56 | 2630.1233 | 24 | 1.8  | 877.7166  | 3 | 23.69 | 5010 | 1.65E+05 | 150 | 173 | Tri nitro benzene; Carboxymethyl                                                                        |
| 43 | R.E(+21.97)LTVA(sub G)NC(+58.01)PC(+58.01)VGALGAMLGGLGR.L    | Y | 22.43 | 2296.05   | 23 | -1.3 | 766.3563  | 3 | 25.29 | 5333 | 1.77E+05 | 150 | 172 | Replacement of 2 protons by magnesium; Carboxymethyl                                                    |
| 44 | L.T(+136.03)VGT(+14.02)GSR.F                                 | Y | 21.63 | 826.395   | 7  | 0.3  | 414.2049  | 2 | 13.85 | 1413 | 1.06E+04 | 130 | 136 | O-Diethylphosphorylation; Methylation                                                                   |
| 45 | R.V(+119.04)NGA(sub D)NTLTVGTGSRFR.D                         | Y | 21.54 | 1767.9016 | 16 | -2   | 590.3066  | 3 | 28.78 | 6462 | 9.61E+04 | 123 | 138 | Pyridylacetyl                                                                                           |
| 46 | R.QC(sub W)LAH(sub L)SGGHGYSPTLR.V                           | Y | 21.25 | 1682.7947 | 16 | 4.8  | 842.4086  | 2 | 41.03 | 8717 | 0        | 90  | 105 |                                                                                                         |
| 47 | R.E(+27.99)LT(+203.08)VGNC(+58.01)PC(+58.01)VGALGAMLGGLGR.L  | Y | 21.22 | 2491.1394 | 23 | 3    | 831.3896  | 3 | 25.89 | 5462 | 1.41E+05 | 150 | 172 | Formylation; HexNAcylation (ST); Carboxymethyl                                                          |
| 48 | R.V(+41.03)(+88.00)NGDNTLTVGTGSRFR.D                         | Y | 21.13 | 1821.8792 | 16 | 6.8  | 608.3044  | 3 | 45.19 | 9308 | 0        | 123 | 138 | Amidination of lysines or N-terminal amines with methyl acetimidate; 3-sulfanylpropanoyl                |
| 49 | V.LLVD(sub A)Q(sub P)SIAASIARE                               | Y | 20.98 | 1355.7772 | 13 | 7.2  | 678.9008  | 2 | 22    | 4258 | 1.45E+05 | 12  | 24  |                                                                                                         |
| 50 | I.N(+228.11)E(sub V)VYAGPAERGR.A                             | Y | 20.6  | 1545.7535 | 12 | 2.4  | 516.2597  | 3 | 22.39 | 4390 | 1.68E+08 | 286 | 297 | 2,4-diacetamido-2,4,6-trideoxyglucopyranose                                                             |
| 51 | R.A(+88.00)INALQ(sub P)ADYSAPHR.H                            | Y | 20.52 | 1760.8303 | 15 | 1    | 881.4233  | 2 | 27.15 | 6053 | 8.23E+05 | 389 | 403 | 3-sulfanylpropanoyl                                                                                     |
| 52 | D.IITAYNADREL.T                                              | Y | 20.26 | 1378.7092 | 12 | 8.6  | 690.3678  | 2 | 16.69 | 2354 | 1.02E+05 | 140 | 151 |                                                                                                         |
| 53 | R.GAD(sub G)QNL(sub F)GIVYE.A                                | Y | 20.22 | 1177.5615 | 11 | -2.4 | 589.7866  | 2 | 13.16 | 1239 | 3.54E+05 | 213 | 223 |                                                                                                         |
| 54 | R.E(+41.03)LTVG(+88.00)NC(+58.01)PC(+58.01)VGALGAMLG.G       | Y | 20.19 | 2005.8617 | 19 | 3.2  | 669.63    | 3 | 27.98 | 6197 | 1.09E+05 | 150 | 168 | Amidination of lysines or N-terminal amines with methyl acetimidate; 3-sulfanylpropanoyl; Carboxymethyl |
| 55 | R.D(sub G)H(+70.04)FDGYHAIPRNLANS                            | Y | 20.06 | 2081.9707 | 17 | -3.9 | 1041.9885 | 2 | 20.19 | 3709 | 4.90E+05 | 485 | 501 | Crotonaldehyde                                                                                          |
| 56 | H.E(-15.01)(+21.98)NPLASTAVLIESFGER.A                        | Y | 19.97 | 1939.9503 | 18 | -1.2 | 647.6566  | 3 | 30.11 | 7389 | 3.26E+06 | 371 | 388 | ISD (z+2)-series; Sodium adduct                                                                         |
| 57 | P.ALAIATN(sub I)F(+17.99)QNDPR.T                             | Y | 19.76 | 1447.7219 | 13 | -9.5 | 483.5767  | 3 | 17.31 | 2541 | 1.43E+06 | 265 | 277 | Fluorination                                                                                            |
| 58 | Y.QS(sub N)Y(+122.01)ANDDEPLSALYGFDDGR.H                     | Y | 19.6  | 2353.9739 | 20 | 0.8  | 1177.9951 | 2 | 16.69 | 2413 | 3.47E+05 | 451 | 470 | O-Isopropylphosphorylation                                                                              |
| 59 | P.C(+58.01)(+162.05)VGALGAM(-4.99)LGGGLGR.L                  | Y | 19.56 | 1545.757  | 15 | 0.4  | 516.2598  | 3 | 26.04 | 5578 | 0        | 158 | 172 | Carboxymethyl; Hexose; Methionine replacement by azido homoalanine                                      |
| 60 | R.D(+41.03)IITAYNADRE                                        | Y | 19.12 | 1292.6361 | 11 | 0.3  | 647.3255  | 2 | 15.67 | 2045 | 3.16E+05 | 139 | 149 | Amidination of lysines or N-terminal amines with methyl acetimidate                                     |
| 61 | R.N(+68.06)(+28.03)FAYSRVNGDNTLTVGTGSR.F                     | Y | 19.04 | 2224.1235 | 20 | -3.4 | 742.3793  | 3 | 20.13 | 3591 | 1.29E+07 | 117 | 136 | Piperidination; Dimethylation                                                                           |
| 62 | C.PC(+58.01)VGP(sub A)LGAMF(sub L)GGGLGR.L                   | Y | 19.04 | 1545.7432 | 16 | 9    | 516.2596  | 3 | 41.13 | 8731 | 0        | 157 | 172 | Carboxymethyl                                                                                           |
| 63 | R.TDTTGILINVY(+44.99)AG.P                                    | Y | 18.93 | 1480.741  | 14 | 0.5  | 494.5879  | 3 | 44.19 | 9167 | 0        | 278 | 291 | Oxidation to nitro                                                                                      |

(to be continued)

(continued)

|    |                                                                  |   |       |           |    |      |           |   |       |      |          |     |     |                                                                                                         |
|----|------------------------------------------------------------------|---|-------|-----------|----|------|-----------|---|-------|------|----------|-----|-----|---------------------------------------------------------------------------------------------------------|
| 64 | V.G(+71.04)ALGV(sub A)MLGGGLGR.L                                 | Y | 18.8  | 1227.6758 | 13 | 0.3  | 614.8453  | 2 | 20.67 | 3759 | 2.75E+06 | 160 | 172 | Propionamide (K, X@N-term)                                                                              |
| 65 | T.L(+56.06)P(sub T)VGTGSR.F                                      | Y | 18.76 | 841.5021  | 8  | -0.3 | 421.7582  | 2 | 30.19 | 6773 | 0        | 129 | 136 | Diethylation                                                                                            |
| 66 | R.H(+183.98)V(sub F)FANAVAIAASWTDDAAE.A                          | Y | 18.57 | 2212.937  | 20 | 0    | 738.653   | 3 | 19.94 | 3484 | 1.15E+04 | 404 | 423 | 3-Sulfobenzoic succinimidyl ester                                                                       |
| 67 | G.N(-15.01)C(+58.01)PC(+58.01)VGALA(sub G)AMLGGLGR.L             | Y | 18.45 | 1759.8055 | 18 | -3.3 | 880.9071  | 2 | 32.44 | 7207 | 2.36E+05 | 155 | 172 | ISD (z+2)-series; Carboxymethyl                                                                         |
| 68 | N.T(+71.04)LT(+79.96)VGTGSR.F                                    | Y | 18.31 | 1041.4761 | 9  | -3.9 | 521.7433  | 2 | 19.38 | 3382 | 8.26E+05 | 128 | 136 | Propionamide (K, X@N-term); Sulfation                                                                   |
| 69 | V.L(+41.03)LVAS(sub P)SIAASIAR.E                                 | Y | 18.31 | 1311.7874 | 13 | 7.9  | 438.2732  | 3 | 23.66 | 4866 | 4.88E+05 | 12  | 24  | Amidination of lysines or N-terminal amines with methyl acetimidate                                     |
| 70 | V.V(+28.03)Y(+15.99)AGPAER.G                                     | Y | 18.16 | 905.4606  | 8  | 0.3  | 453.7377  | 2 | 12.54 | 1134 | 4.91E+05 | 288 | 295 | Ethylation; Oxidation or Hydroxylation                                                                  |
| 71 | R.AN(sub I)AS(+159.93)LYEPLALSMPT.D                              | Y | 18.15 | 1736.7134 | 15 | 4.2  | 579.9142  | 3 | 21.07 | 4008 | 3.72E+07 | 298 | 312 | Pyrophosphorylation (ST)                                                                                |
| 72 | R.EM(sub I)AS(+79.96)EYVGPEWPEFANATER.W                          | Y | 18.12 | 2391.9624 | 20 | 0.1  | 798.3282  | 3 | 17.93 | 2744 | 1.87E+04 | 37  | 56  | Sulfation                                                                                               |
| 73 | R.H(+28.03)(+183.04)FFANAVAIAASWTDDAA.A                          | Y | 18.06 | 2087.9412 | 18 | 2.1  | 696.9891  | 3 | 21.74 | 4167 | 2.50E+05 | 404 | 421 | Ethylation; Aminoethylbenzenesulfonylation                                                              |
| 74 | R.H(+233.05)FFP(sub A)NAVAIAASWTDD.A                             | Y | 18.02 | 1993.8668 | 16 | 0    | 665.6296  | 3 | 29.66 | 6634 | 0        | 404 | 419 | 5-dimethylaminonaphthalene-1-sulfonyl                                                                   |
| 75 | R.N(+43.01)C(sub F)AYSRVNGDNTLTVGTGSR.F                          | Y | 17.96 | 2126.9763 | 20 | 6.2  | 1064.5021 | 2 | 41.13 | 8730 | 0        | 117 | 136 | Carbamylation                                                                                           |
| 76 | A.W(sub L)GAMLGGL(+53.97)GR.L                                    | Y | 17.7  | 1127.5157 | 11 | 4.8  | 564.7679  | 2 | 12.73 | 1124 | 2.98E+05 | 162 | 172 | Trifluoroleucine                                                                                        |
| 77 | R.NV(sub F)AY(+15.01)SRVNGDNTLTVGTGSR.F                          | Y | 17.69 | 2095.0405 | 20 | 1.2  | 1048.5288 | 2 | 32.97 | 7348 | 2.79E+05 | 117 | 136 | Tyrosine oxidation to 2-aminotyrosine                                                                   |
| 78 | K.C(+127.06)(sub R)LTALKKK.Y                                     | Y | 17.57 | 1030.6208 | 8  | -6.8 | 516.3142  | 2 | 33.6  | 7395 | 2.14E+04 | 473 | 480 | N-Succinimidyl-2-morpholine acetate                                                                     |
| 79 | C.PC(+58.01)VGALV(sub G)AMM(sub L)GGGLGR.L                       | Y | 17.51 | 1545.7466 | 16 | 7.6  | 516.2601  | 3 | 39.65 | 8509 | 0        | 157 | 172 | Carboxymethyl                                                                                           |
| 80 | R.H(+183.04)FFAN(+28.03)AVAIAASWTDD.A                            | Y | 17.49 | 1945.8668 | 16 | 3.4  | 649.6318  | 3 | 31.51 | 7075 | 0        | 404 | 419 | Aminoethylbenzenesulfonylation; Dimethylation                                                           |
| 81 | C.L(sub P)C(+58.01)VGALGD(sub A)MLGGGLGR.L                       | Y | 17.47 | 1545.7643 | 16 | -4.1 | 516.2599  | 3 | 28.29 | 6277 | 0        | 157 | 172 | Carboxymethyl                                                                                           |
| 82 | K.Y(+43.01)DS(sub P)RGHFDGYHAIPR.N                               | Y | 17.47 | 1832.8342 | 15 | -1.6 | 611.951   | 3 | 16.81 | 2385 | 3.69E+05 | 481 | 495 | Carbamylation                                                                                           |
| 83 | R.V(+68.06)N(+28.03)GDNTLTVGTGSRFR.D                             | Y | 17.32 | 1788.9482 | 16 | 1.9  | 597.3245  | 3 | 26.18 | 5607 | 3.02E+04 | 123 | 138 | Piperidination; Dimethylation                                                                           |
| 84 | R.E(+134.05)(+14.02)TGPSNGSVWPR.E                                | Y | 17.22 | 1433.6687 | 12 | 5.7  | 717.8457  | 2 | 17.9  | 2627 | 2.84E+04 | 25  | 36  | 3-methyl-2-pyridyl isocyanate; Methylation                                                              |
| 85 | I.N(+204.00)VVY(+108.00)AGPAERGR.A                               | Y | 17.21 | 1599.6642 | 12 | 7    | 534.2324  | 3 | 19.09 | 3272 | 1.28E+07 | 286 | 297 | Addition of DFDNB crosslinker; O-Ethylphosphorylation                                                   |
| 86 | E.LT(+77.99)VGNC(+58.01)PC(+58.01)VGALGAMLGGLGR.L                | Y | 17.17 | 2209.0095 | 22 | -0.9 | 553.2592  | 4 | 25.22 | 5323 | 2.91E+05 | 151 | 172 | Methylphosphorylation; Carboxymethyl                                                                    |
| 87 | C.P(+148.04)C(+58.01)VGALGAMW(sub L)GGGLGR.L                     | Y | 17.08 | 1706.7756 | 16 | -3.9 | 854.3918  | 2 | 24.2  | 4969 | 8.87E+03 | 157 | 172 | Glycosyl-L-hydroxyproline; Carboxymethyl                                                                |
| 88 | R.E(+214.97)TGP(+88.00)SNGSVWPR.E                                | Y | 16.96 | 1588.5745 | 12 | 2.9  | 530.5336  | 3 | 16.54 | 2352 | 1.77E+06 | 25  | 36  | 4-sulfohenyl isothiocyanate; 3-sulfanylpropanoyl                                                        |
| 89 | R.AIL(sub N)AP(sub L)PADYSAFPHR.H                                | Y | 16.89 | 1624.8361 | 15 | 4.3  | 813.4288  | 2 | 18.39 | 3000 | 4.33E+05 | 389 | 403 |                                                                                                         |
| 90 | V.GS(sub A)LGAMLGGLGR.L                                          | Y | 16.89 | 1144.6023 | 13 | -0.1 | 573.3083  | 2 | 16.57 | 2398 | 9.93E+05 | 160 | 172 |                                                                                                         |
| 91 | T.A(+298.19)Y(-2.02)NADRELTVGNC(+58.01)PC(+58.01)VGALGAMLGGLGR.L | Y | 16.76 | 3246.551  | 29 | 6.3  | 1083.1978 | 3 | 26.33 | 5749 | 1.40E+07 | 144 | 172 | Levuglandinyl-lysine anhydropyrrole adduct; 2-amino-3-oxo-butanoic acid; Carboxymethyl                  |
| 92 | R.QWLP(sub A)L(+53.97)SGGHGYSPTLR.V                              | Y | 16.54 | 1821.8773 | 16 | 8.5  | 608.3049  | 3 | 26.53 | 5731 | 0        | 90  | 105 | Trifluoroleucine                                                                                        |
| 93 | P.AL(+53.97)AIATIL(sub F)QNDPR.T                                 | Y | 16.52 | 1448.7599 | 13 | 7.2  | 483.9307  | 3 | 17.49 | 2796 | 5.04E+04 | 265 | 277 | Trifluoroleucine                                                                                        |
| 94 | R.ET(+114.04)GP(-27.99)SNGSVWPRIAS.E                             | Y | 16.5  | 1771.8489 | 16 | 9.2  | 591.629   | 3 | 20.56 | 3795 | 1.34E+05 | 25  | 40  | Ubiquitin; Pyrrolidone from Proline                                                                     |
| 95 | R.DM(sub I)JITAYNADR.E                                           | Y | 16.44 | 1269.5659 | 11 | 3.2  | 635.7923  | 2 | 22.13 | 4306 | 7.45E+04 | 139 | 149 |                                                                                                         |
| 96 | R.E(+41.03)LT(+95.94)VGNC(+58.01)PC(+58.01)VGALGAMLGGL.G         | Y | 16.44 | 2183.9124 | 21 | 0.1  | 728.9781  | 3 | 19.84 | 4216 | 4.42E+05 | 150 | 170 | Amidination of lysines or N-terminal amines with methyl acetimidate; Thiophosphorylation; Carboxymethyl |
| 97 | R.VNGDNTLT(+164.06)VGTCSRFRD.I                                   | Y | 16.41 | 1971.9415 | 17 | -1.4 | 658.3202  | 3 | 25.44 | 5413 | 4.91E+05 | 123 | 139 | O-Diisopropyl-phosphorylation                                                                           |
| 98 | R.V(sub E)IAS(+88.00)EYVGPEWPEFANATER.W                          | Y | 16.28 | 2352.0732 | 20 | 6.5  | 589.0294  | 4 | 21.55 | 4215 | 8.39E+04 | 37  | 56  | 3-sulfanylpropanoyl                                                                                     |
| 99 | R.V(+42.01)ND(sub G)DNTLTVGTCSRFR.D                              | Y | 16.24 | 1792.8704 | 16 | -6.1 | 897.437   | 2 | 26.36 | 6138 | 1.63E+06 | 123 | 138 | Acetylation (N-term)                                                                                    |

(to be continued)

(continued)

|     |                                                                                        |   |       |           |    |      |           |   |       |      |          |     |     |                                                                                       |
|-----|----------------------------------------------------------------------------------------|---|-------|-----------|----|------|-----------|---|-------|------|----------|-----|-----|---------------------------------------------------------------------------------------|
| 100 | T.A(+68.06)YN(+29.04)ADRELTVGNC(+58.01)PC(+58.01)V<br>GALGAMLGGGLGR.L                  | Y | 16.21 | 3047.4753 | 29 | 4.6  | 1016.837  | 3 | 24.01 | 4920 | 4.63E+05 | 144 | 172 | Piperidination; Deamidation followed by esterification<br>with ethanol; Carboxymethyl |
| 101 | P.C(+58.01)(+127.06)VS(sub G)ALGAMLGGGLGR.L                                            | Y | 16.17 | 1545.7643 | 15 | -4.3 | 516.2598  | 3 | 40.54 | 8643 | 0        | 158 | 172 | Carboxymethyl; N-Succinimidyl-2-morpholine acetate                                    |
| 102 | R.H(+183.04)V(sub L)SDTGRQWLALSGGHGYS.P                                                | Y | 16.14 | 2209.9963 | 19 | -2   | 553.5052  | 4 | 25.41 | 5454 | 4.87E+05 | 83  | 101 | Aminoethylbenzenesulfonylation                                                        |
| 103 | K.YD(+43.04)A(sub P)RGHFDGYHAIPR.N                                                     | Y | 16.01 | 1816.8757 | 15 | 5.4  | 606.6358  | 3 | 37.43 | 8179 | 0        | 481 | 495 | Carboxyl modification with ethanolamine                                               |
| 104 | R.V(+58.01)NGD(+15.99)NTLTVGTGSR.F                                                     | Y | 16.01 | 1463.6852 | 14 | -2.3 | 488.9012  | 3 | 36.63 | 8046 | 8.01E+03 | 123 | 136 | Carboxymethyl (KW, X@N-term); Oxidation or<br>Hydroxylation                           |
| 105 | R.E(+37.96)LTG(sub<br>V)GNC(+58.01)PC(+58.01)V<br>GALGAMLG.G                           | Y | 15.93 | 1815.7244 | 18 | 5.1  | 606.2518  | 3 | 29.36 | 6626 | 1.06E+05 | 150 | 167 | Replacement of proton by potassium; Carboxymethyl                                     |
| 106 | L.SGGHGYSP(+42.01)LR.V                                                                 | Y | 15.89 | 1172.5574 | 11 | -6   | 587.2825  | 2 | 20.43 | 3693 | 1.02E+06 | 95  | 105 | Acetylation (TSCYH)                                                                   |
| 107 | A.Q(sub L)PAD(-15.99)YSAFPHR.H                                                         | Y | 15.64 | 1271.6046 | 11 | -3.1 | 424.8742  | 3 | 15.61 | 2140 | 5.44E+05 | 393 | 403 | Deoxy                                                                                 |
| 108 | R.V(+119.04)NGD(-15.99)NTLTVGTGSR.F                                                    | Y | 15.54 | 1492.7271 | 14 | -0.7 | 498.5826  | 3 | 13.44 | 1368 | 1.54E+06 | 123 | 136 | Pyridylacetyl; Deoxy                                                                  |
| 109 | R.HLS(+86.00)DTGRQWLALSGGHGYS.P                                                        | Y | 15.53 | 2126.9771 | 19 | 5.1  | 1064.5012 | 2 | 39.92 | 8551 | 0        | 83  | 101 | Malonylation                                                                          |
| 110 | V.GV(sub A)LGAM(+88.00)LGGGLGR.L                                                       | Y | 15.5  | 1244.637  | 13 | -1.6 | 415.8856  | 3 | 13.31 | 1296 | 2.57E+05 | 160 | 172 | 3-sulfanylpropanoyl                                                                   |
| 111 | R.FRA(sub<br>D)II(+88.00)TTAYNADRELTVGNC(+58.01)PC(+58.01)V<br>GALGAMLGGGLGR.LQGLHGL.T | Y | 15.42 | 4559.2544 | 43 | -1.7 | 912.8566  | 5 | 33.36 | 7464 | 1.60E+04 | 137 | 179 | 3-sulfanylpropanoyl; Carboxymethyl                                                    |
| 112 | T.LVLLVAPSIAAS.I                                                                       | Y | 15.38 | 1152.7118 | 12 | 7.1  | 577.3672  | 2 | 22.13 | 4299 | 9.85E+05 | 10  | 21  |                                                                                       |
| 113 | A.ASWTDDAAAEAAADAW(+162.05)AVEWR.D                                                     | Y | 15.38 | 2353.0134 | 20 | -0.3 | 589.2604  | 4 | 28.86 | 6446 | 4.00E+04 | 414 | 433 | Hexose                                                                                |
| 114 | R.E(+105.90)LT(+126.10)VGNC(+58.01)PC(+58.01)V<br>GALGAMLGGGLGR.L                      | Y | 15.26 | 2492.0667 | 23 | 0.1  | 1247.0408 | 2 | 18.12 | 3156 | 4.03E+07 | 150 | 172 | Replacement of proton by silver; Octanoyl;<br>Carboxymethyl                           |
| 115 | D.LSLGV(sub L)RHLSDTGR.Q                                                               | Y | 15.22 | 1409.7739 | 13 | -7.9 | 470.9282  | 3 | 33.64 | 7506 | 0        | 77  | 89  |                                                                                       |
| 116 | R.E(+43.04)TGP(-27.99)SNGSVWPR.E                                                       | Y | 15.22 | 1300.6523 | 12 | -1.1 | 651.3327  | 2 | 15.64 | 1992 | 3.84E+05 | 25  | 36  | Carboxyl modification with ethanolamine; Pyrrolidone<br>from Proline                  |
| 117 | G.RQWLALSGGHGYSPTLR(+55.92).V                                                          | Y | 15.18 | 1953.9108 | 17 | 7.1  | 652.3155  | 3 | 24.8  | 5192 | 2.68E+04 | 89  | 105 | Replacement of 2 protons by nickel                                                    |
| 118 | A.T(+58.01)(sub S)TTAVLIESFGER.A                                                       | Y | 15.14 | 1480.7408 | 13 | 1.1  | 741.3785  | 2 | 16.54 | 2805 | 7.36E+07 | 376 | 388 | Carboxymethyl (KW, X@N-term)                                                          |
| 119 | Q.G(-15.01)L(+53.97)HGLTSDALR.E                                                        | Y | 15.06 | 1177.5703 | 11 | 2.7  | 589.794   | 2 | 33.15 | 7976 | 1.23E+06 | 175 | 185 | ISD (z+2)-series; Trifluoroleucine                                                    |
| 120 | K.K(+27.99)YDPRGHFDGYHAIPR.N                                                           | Y | 15.05 | 1955.939  | 16 | 1.8  | 652.9881  | 3 | 25.65 | 5470 | 1.94E+06 | 480 | 495 | Formylation                                                                           |
| 121 | R.D(sub V)NGD(+37.96)NTLTVGTGSRFR.D                                                    | Y | 15.05 | 1746.7687 | 16 | -0.7 | 583.2631  | 3 | 12.16 | 947  | 2.95E+04 | 123 | 138 | Replacement of proton by potassium                                                    |
